# Supplementary material for: In situ analysis and real-time monitoring of the decomposition of the 2nd Grubbs catalyst in CH3CN by droplet spray ionization tandem mass spectrometry
Source: Royal Society of Chemistry journal article supplement (doi:10.1039/c7ay01150d), 2017-01-01
Supplement: c7ay01150d1.pdf [file c7ay01150d1.pdf]

Electronic supplementary information

**In situ analysis and real-time monitoring of the decomposition of the  
2<sup>nd</sup> Grubbs catalyst in CH<sub>3</sub>CN by droplet spray ionization tandem  
mass spectrometry**

Jie Jiang,<sup>\*a</sup> Dandan Zhao,<sup>a</sup> Hong Zhang,<sup>b</sup> Jing He<sup>†</sup> and Na Li<sup>\*a</sup>

<sup>a</sup> School of Marine Science and Technology, Harbin Institute of Technology at  
Weihai, Weihai, Shandong 264209, China

<sup>b</sup> State Key Laboratory of Urban Water Resource and Environment, Harbin Institute  
of Technology, Harbin, Heilongjiang 150090, China

Correspondence to: Jie Jiang, E-mail: [jiejjiang@hitwh.edu.cn](mailto:jiejjiang@hitwh.edu.cn),

Na Li, E-mail: [dreamerlina@163.com](mailto:dreamerlina@163.com)

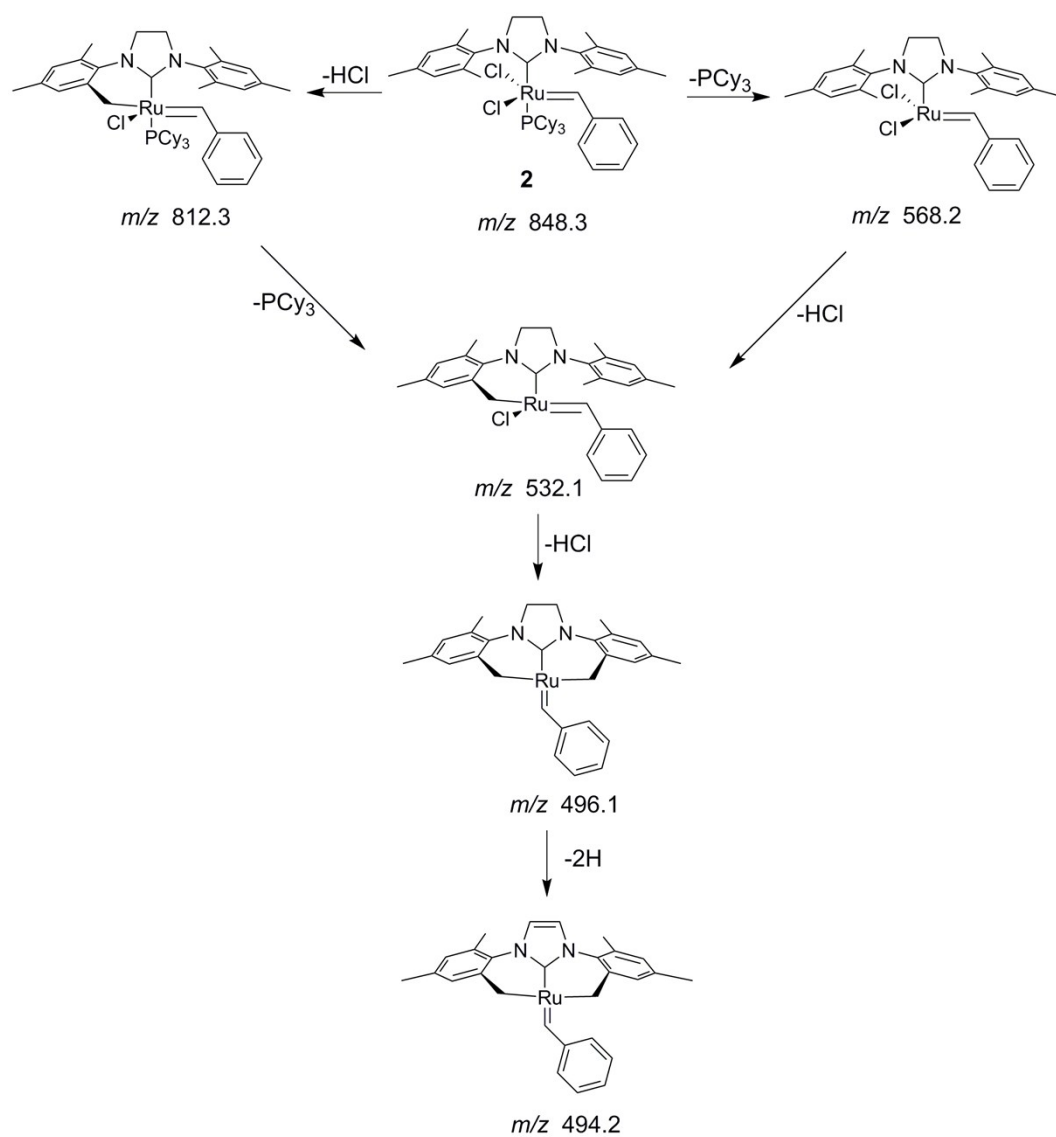

**Fig. S1** Proposed fragment mechanism of **2** at  $m/z$  848.

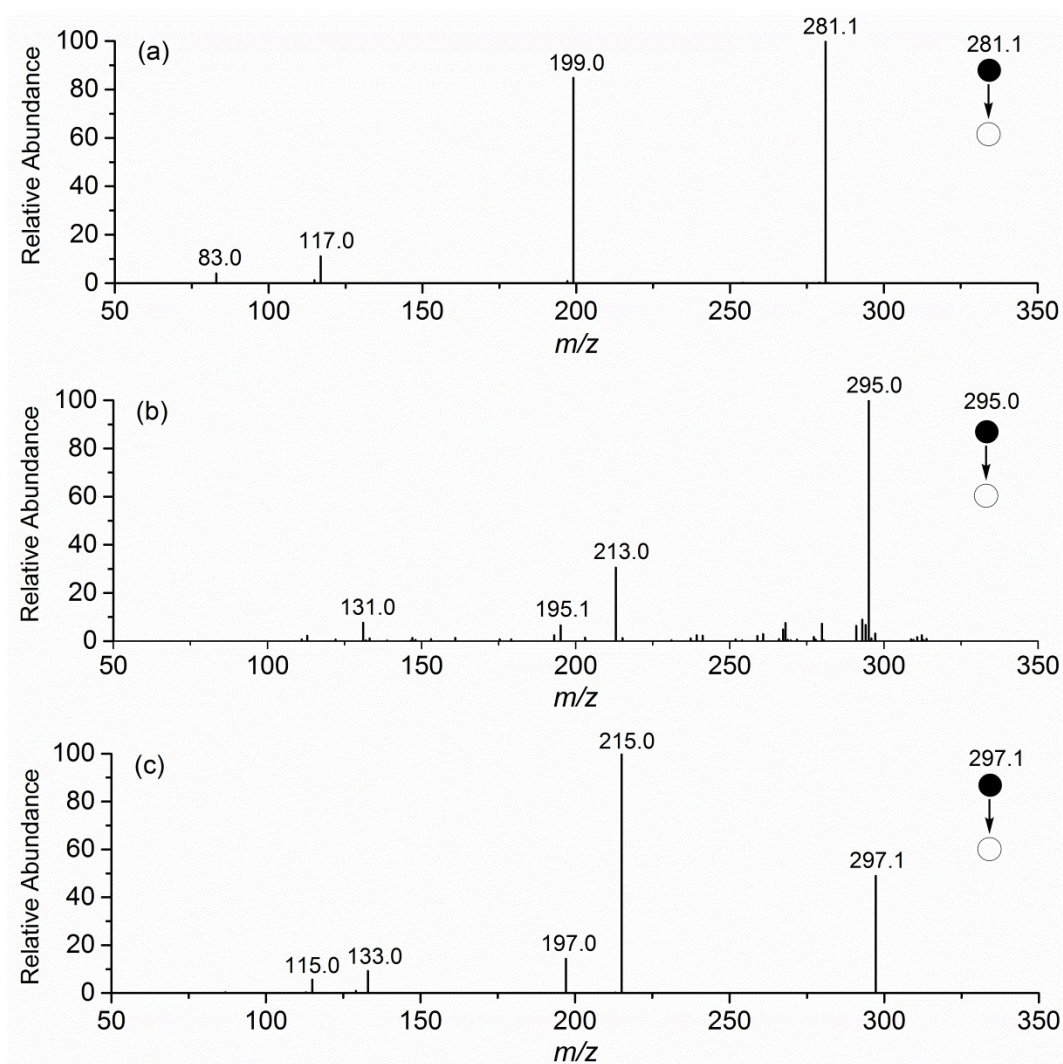

**Fig. S2** DSI-MS/MS spectra for CID of ions: (a)  $[\text{Cy}_3\text{P}+\text{H}]^+$  at  $m/z$  281; (b)  $[\text{Cy}_3\text{PCH}_3]^+$  at  $m/z$  295; (c) the hydride of  $[\text{Cy}_3\text{PCH}_3]^+$  at  $m/z$  297.

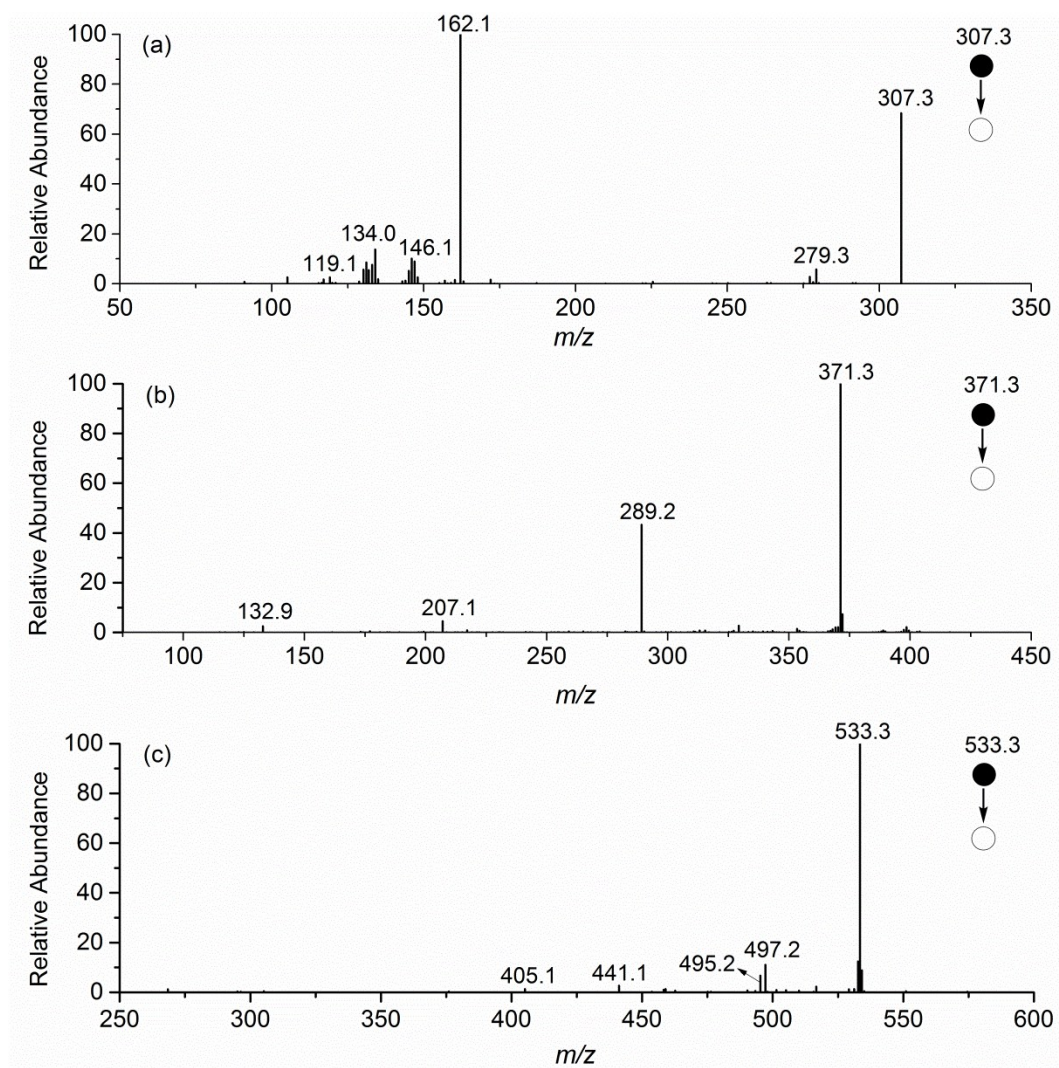

**Fig. S3** DSI-MS/MS spectra for CID of ions: (a)  $[\text{H}_2\text{IMes}+\text{H}]^+$  at  $m/z$  307; (b)  $[\text{Cy}_3\text{PCH}_2\text{Ph}]^+$  at  $m/z$  371; (c)  $[(\text{H}_2\text{IMes})\text{ClRu}=\text{CHPh}]^+$  at  $m/z$  533.

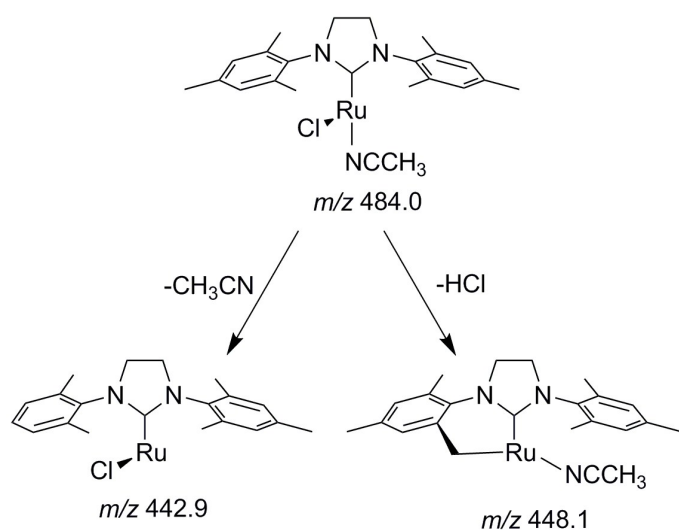

**Fig. S4** Proposed fragmentation mechanism of the ions of **12** at  $m/z$  484.

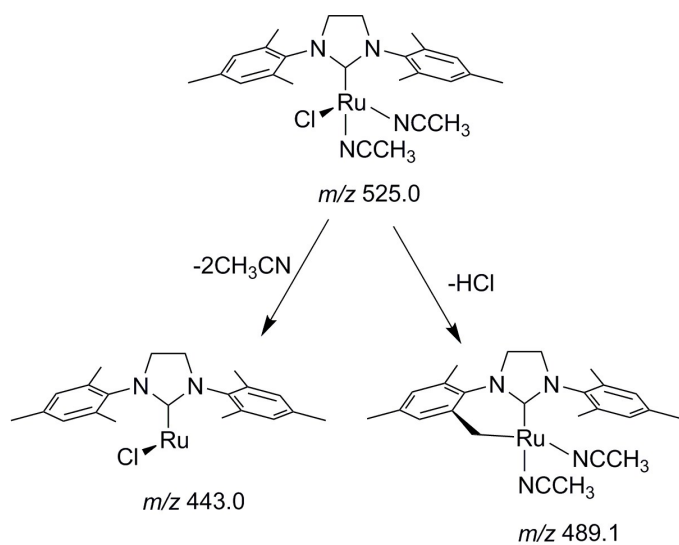

**Fig. S5** Proposed fragmentation mechanism of the ions of **8** at  $m/z$  525.

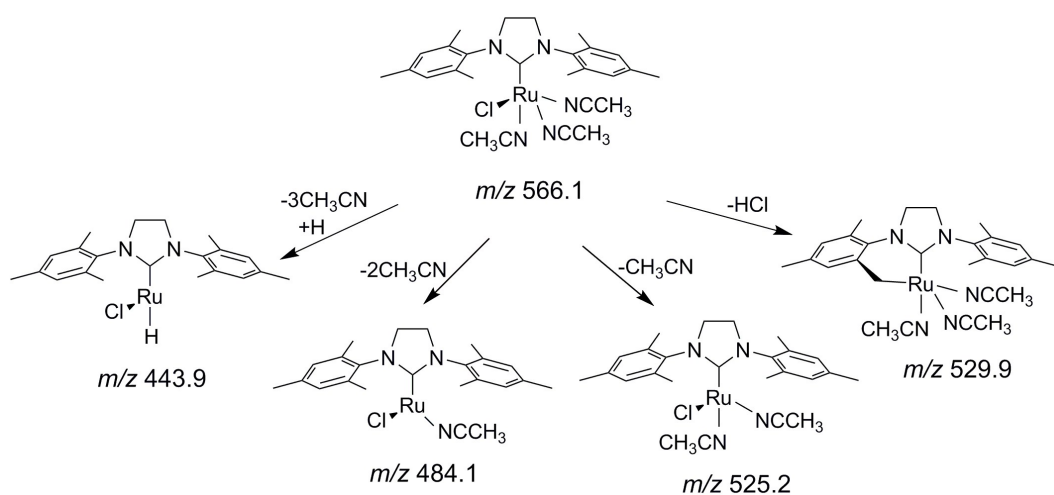

**Fig. S6** Proposed fragmentation mechanism of the ions of **10** at  $m/z$  566.

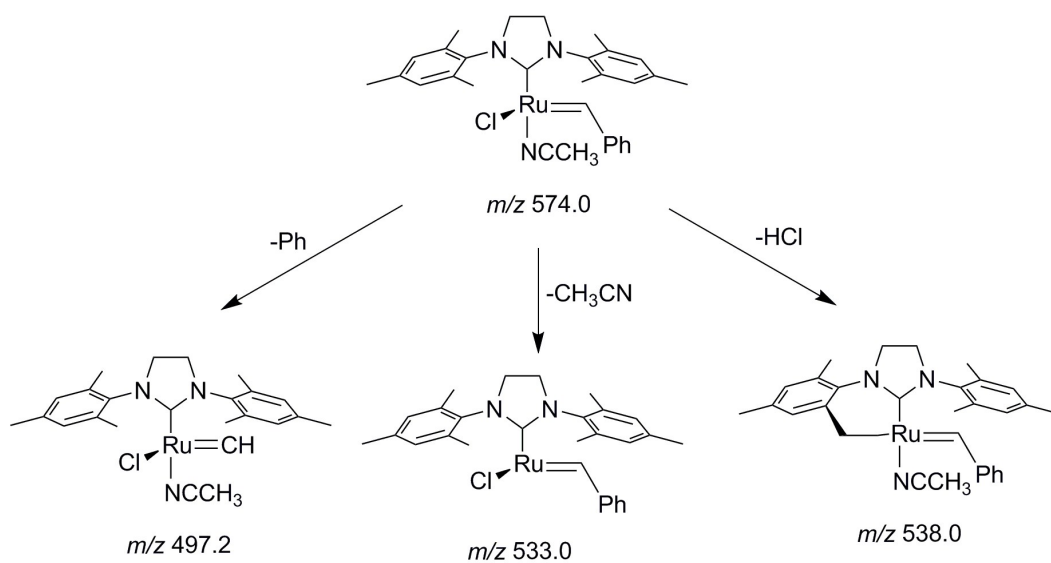

**Fig. S7** Proposed fragmentation mechanism of the ions of **6** at  $m/z$  574.

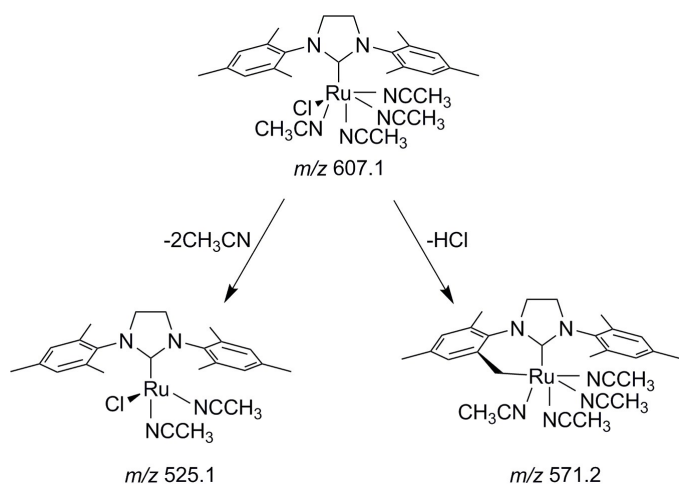

**Fig. S8** Proposed fragmentation mechanism of the ions of **9** at  $m/z$  607.

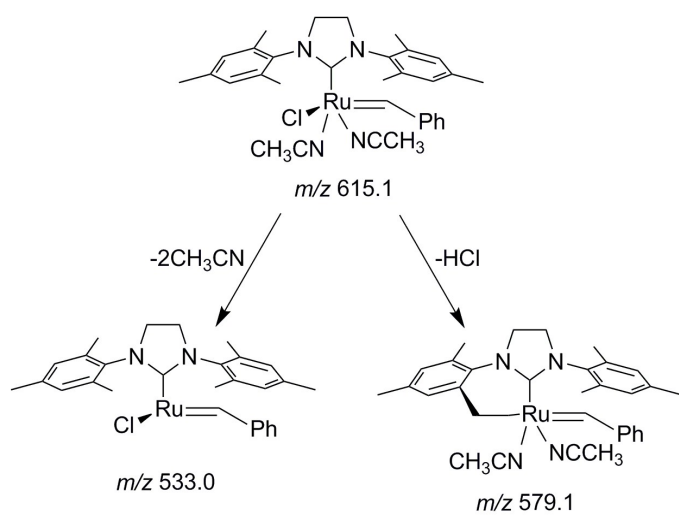

**Fig. S9** Proposed fragmentation mechanism of the ions of **5** at  $m/z$  615.

**Table S1** The  $m/z$  error of compounds.

| Compound  | Theoretical $m/z$ | Measured $m/z$ | Error (ppm) |
|-----------|-------------------|----------------|-------------|
| <b>2</b>  | 848.3300          | 848.3293       | -0.83       |
| <b>3</b>  | 813.3612          | 813.3600       | -1.48       |
| <b>4</b>  | 533.1292          | 533.1270       | -4.13       |
| <b>5</b>  | 615.1823          | 615.1821       | -0.33       |
| <b>6</b>  | 574.1558          | 574.1539       | -3.31       |
| <b>7</b>  | 854.3877          | 854.3855       | -2.57       |
| <b>8</b>  | 525.1354          | 525.1349       | -0.95       |
| <b>9</b>  | 607.1884          | 607.1895       | +1.81       |
| <b>10</b> | 566.1619          | 566.1624       | +0.88       |
| <b>11</b> | 846.3939          | 846.3937       | -0.24       |
| <b>12</b> | 484.1088          | 484.1084       | -0.83       |

## References

- 1 H. Y. Wang, W. L. Yim, Y. L. Guo and J. O. Metzger, *Organometallics*, 2012, **31**, 1627-1634.
- 2 H. Y. Wang and J. O. Metzger, *Organometallics*, 2008, **27**, 2761-2766.
